# Supplementary material for: A water-soluble and water-coordinated Mn(ii) complex: synthesis, characterization and phantom MRI image study
Source: Royal Society of Chemistry journal article supplement (doi:10.1039/c5dt01781e), 2015-01-01
Supplement: c5dt01781e1.pdf [file c5dt01781e1.pdf]

# A Water-Soluble and Water-Coordinated Mn(II) Complex: Synthesis, Characterization and Phantom MRI Image Study

Bedika Phukan,<sup>a</sup> Anant B Patel,<sup>b</sup> and Chandan Mukherjee\*<sup>a</sup>

**\*Corresponding address:**

Dr. Chandan Mukherjee, Department of Chemistry, Indian Institute of Technology Guwahati,  
Guwahati, 781039, Assam, India

Email: [cmukherjee@iitg.ernet.in](mailto:cmukherjee@iitg.ernet.in)

Phone No. +91-361-258-2327

Fax: +91-361-258-2349

| <b>Contents</b>                                                                | <b>Page</b> |
|--------------------------------------------------------------------------------|-------------|
| Materials and Physical methods                                                 | S3          |
| Experimental Section: Synthesis and Characterization                           | S3-S4       |
| UV-Vis spectra of ligand, and the complex                                      | S4          |
| UV-Vis spectral changes during competitive study                               | S5          |
| <sup>1</sup> H and <sup>13</sup> C NMR for H <sub>4</sub> bedik                | S5-S6       |
| 1/T <sub>1</sub> vs [Mn(II)] plot for the measurement performed at 1.41 T      | S6          |
| ESI-MS(-ve) of complex <b>1</b>                                                | S7          |
| Crystallographic data and structure refinement parameters for complex <b>1</b> | S7-S8       |

**Materials:** All the chemicals and solvents were obtained from commercial sources and were used as supplied, unless noted otherwise. 2-aminobenzylamine was purchased from Sigma-Aldrich. *Tert*-butylbromoacetate and TFA were purchased from Spectrochem.  $\text{MnCl}_2 \cdot 4\text{H}_2\text{O}$ ,  $\text{KHCO}_3$  and solvents were obtained from Merck (India). HEPES buffer was purchased from SRL. Water used for the experiments was purified by using millipore-water purifier, Milli-Q, Merck.

**Physical Methods:** X-ray crystallographic data were collected using Super Nova, Single source at offset, Eos diffractometer. Structures were solved by direct methods using SHELXS-97 and refined with full-matrix least squares on  $F^2$  using SHELXL-97. All the non-hydrogen atoms were refined anisotropically. FT-IR spectra were recorded on Perkin Elmer Instrument at normal temperature making KBr pellet grinding the sample with KBr (IR Grade). UV-Vis/NIR spectra were recorded on Perkin Elmer, Lambda 750, UV/VIS/NIR spectrometer. Mass spectral data were obtained from either HRMS or QTOF MS Spectrometer.  $^1\text{H}$  and  $^{13}\text{C}$  NMR analyses were carried out using BRUKER 400 MHz NMR machine. The longitudinal ( $r_1$ ) relaxivity at 1.41 T was measured using Bruker minispec mq60 NMR Analyzer. The longitudinal and transverse relaxivity at 14.1 T were measured using Bruker Avance II 600 MHz NMR microimager. MRI images were collected using either Bruker Avance II 14.1 T NMR machine or BRIVO MR355 1.5 T MRI Scanner.

## Experimental Section:

**Synthesis of  $[\text{C}_{31}\text{H}_{50}\text{N}_2\text{O}_8]$ , (A):** To *tert*-butyl bromoacetate (11.70 g, 60 mmol) in DMF (15 mL),  $\text{KHCO}_3$  (1.20 g, 120 mmol) was added and the suspension was cooled to  $0^\circ\text{C}$ . A solution of 2-aminobenzylamine (1.22 g, 10 mmol) in DMF (2 mL) was added drop wise to the stirred solution. The resulting reaction mixture was stirred at  $0^\circ\text{C}$  for 30 min. After that the stirring was continued further at room temperature ( $25^\circ\text{C}$ ) for 22 h. A saturated  $\text{NaHCO}_3$  solution was added to the reaction mixture, and the mixture was extracted with diethyl ether. The organic phase was dried over  $\text{Na}_2\text{SO}_4$ , filtered and then the solvent was removed completely to get the crude product as brown coloured oil. Trituration of the crude product with hexane afforded the pure compound as white solid. Yield = 2.76 g, 48 %. FTIR (KBr,  $\text{cm}^{-1}$ ): 3434, 2978, 2933, 2914, 1742, 1642, 1457, 1370, 1247, 1156, 971, 843, 750, 601.  $^1\text{H}$  NMR ( $\text{CDCl}_3$ , 399.85 MHz):  $\delta$  7.82 (d,  $J=7.2$  Hz, 1H), 7.47(d,  $J=7.6$  Hz, 1H), 7.43–7.39 (m,1H), 7.24–7.21 (m,1H), 5.16 (s, 2 H), 4.87 (s, 1H), 4.83 (s, 1H), 4.30 (s, 1H), 4.26 (s, 1H), 3.90 (s, 4H), 1.43 (s, 18H), 1.38 (s, 18H) ppm.  $^{13}\text{C}$  NMR ( $\text{CDCl}_3$ , 100.55 MHz):  $\delta$  170.9, 164.6, 149.9, 134.3, 131.6, 126.4, 125.4, 84.5, 82.4, 58.3, 56.6, 54.9, 27.9 ppm. ESI-MS (+)  $m/z$  for  $[\text{C}_{31}\text{H}_{50}\text{N}_2\text{O}_8 + \text{H}]^+$ : Calcd, 579.3645 ; Found, 579.3734.

**Synthesis of [C<sub>15</sub>H<sub>18</sub>N<sub>2</sub>O<sub>8</sub>], H<sub>4</sub>bedik:** Compound A (0.579 g, 1 mmol) in CH<sub>2</sub>Cl<sub>2</sub>/TFA (1:1, 4 mL) was stirred at room temperature (25 °C) for 16 h. The solvent was evaporated in *vacuo*. The product was obtained as white solid by adding excess diethyl ether. The solid was then filtered, washed with diethyl ether (10 mL) and then dried under vacuum. Yield = 0.339 g, 96%. FTIR (KBr, cm<sup>-1</sup>): 3450, 3013, 2964, 2925, 1732, 1630, 1603, 1496, 1407, 1199, 968, 891, 782, 721, 601. <sup>1</sup>H NMR (CDCl<sub>3</sub>, 399.85 MHz): δ 7.28 (d, *J* = 8 Hz, 1H), 7.20–7.16 (m, 1H), 7.06 (d, *J* = 6.8 Hz, 1H), 6.96–6.93 (m, 1H), 4.44 (s, 2 H), 3.87 (s, 4H), 3.76 (s, 4H) ppm. <sup>13</sup>C NMR (CD<sub>3</sub>OD, 100.55 MHz): δ 174.8, 169.3, 151.2, 134.3, 132.8, 127.9, 127.4, 125.9, 58.5, 56.6, 55.4, 49.8 ppm. ESI-MS (+) *m/z* for [C<sub>15</sub>H<sub>18</sub>N<sub>2</sub>O<sub>8</sub> + H]<sup>+</sup>: Calcd, 355.1141; Found, 355.1175.

**Synthesis of complex 1:** To a solution of H<sub>4</sub>bedik (0.177 g, 0.5 mmol) in water (3 mL) was added MnCl<sub>2</sub>•4H<sub>2</sub>O (0.082 g, 0.48 mmol) and stirred for 10 min. The solution became transparent and then the pH of the solution was adjusted to ~ 6.5 by adding aq. NaOH solution drop wise. Stirring was continued at room temperature (30 °C) for 24 hours. The resulted clear solution was kept at room temperature (25 °C) for slow evaporation to obtain crystal. The appeared colourless crystals were washed thoroughly with MeOH. The obtained crystals were suitable for single crystal X-ray diffraction study. Yield = 0.098g, 64% (or 32% if it is considered that maximum yield would be 50 in percentage scale). FTIR (KBr, cm<sup>-1</sup>): 3389, 1591, 1496, 1412, 1316, 1102, 1010, 939, 905, 779, 748, 711, 618. ESI-MS (-) *m/z* for [C<sub>15</sub>H<sub>14</sub>MnN<sub>2</sub>O<sub>8</sub> + H]<sup>-</sup>: Calcd, 406.0209; Found, 406.0095. Anal. Calcd. for C<sub>15</sub>H<sub>32</sub>Mn<sub>2</sub>N<sub>2</sub>O<sub>17</sub>: C, 28.94; H, 5.18 ; N, 4.50. Found: C, 28.80; H, 4.68; N, 4.38.

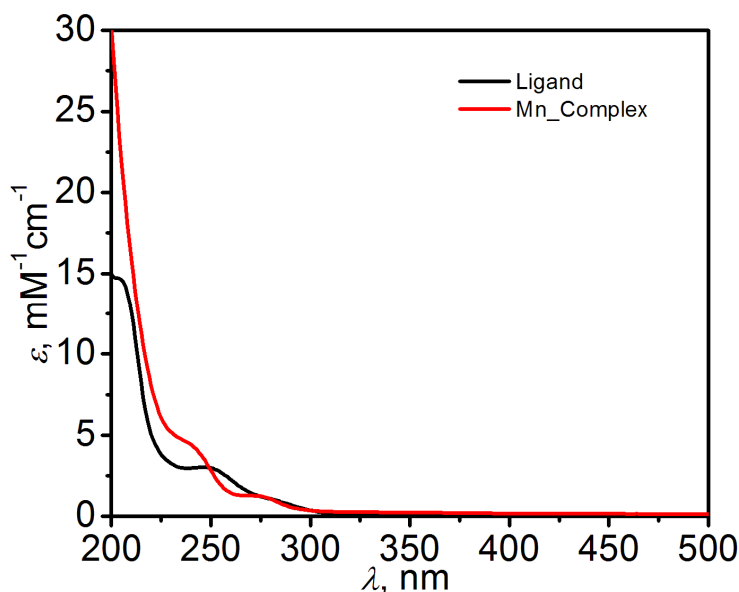

**Figure 1:** UV-Vis spectra of the aqueous solutions of the ligand H<sub>4</sub>bedik and the complex.

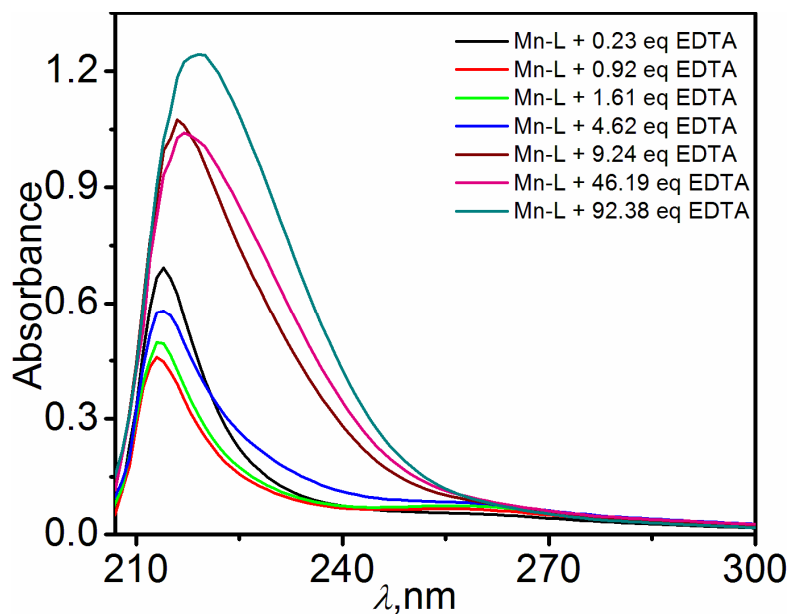

**Figure 2.** Spectral changes during the competitive study.

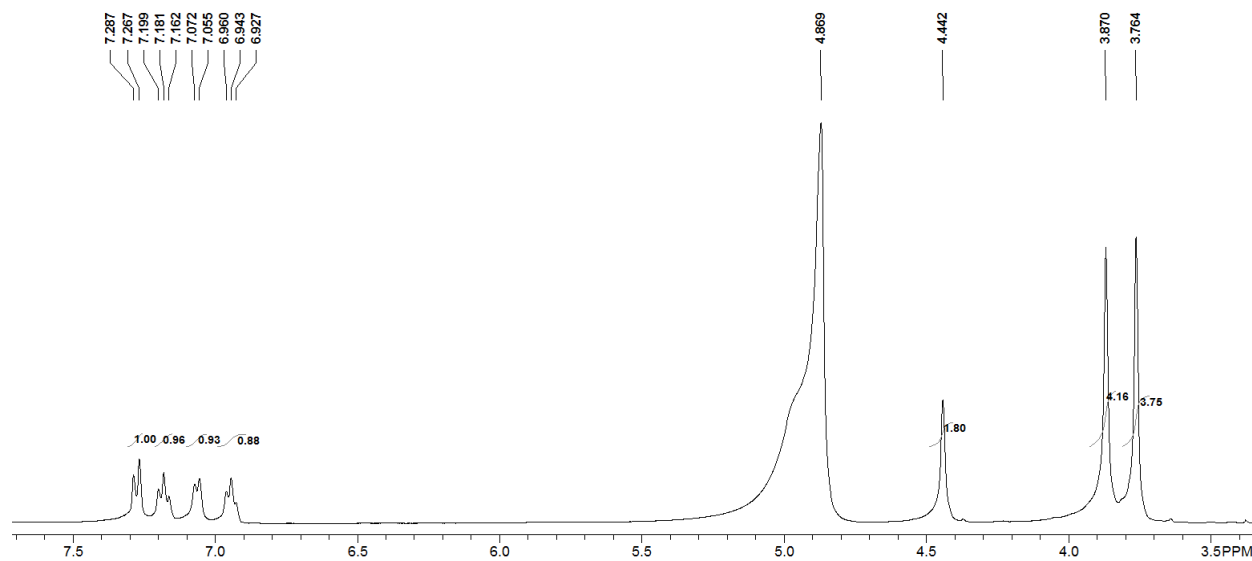

**Figure 3.**  $^1\text{H}$  NMR spectrum of ligand  $\text{H}_4\text{bedik}$  measured in  $\text{CD}_3\text{OD}$  solvent.

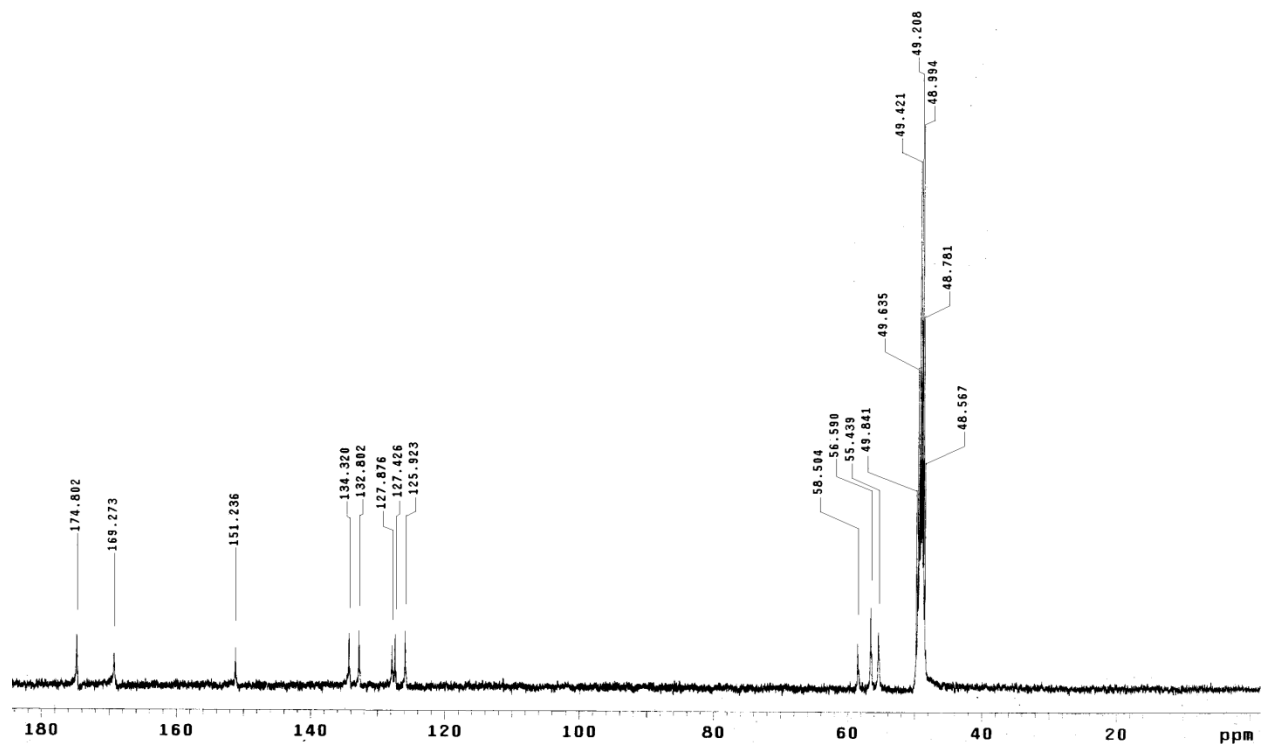

**Figure 4.**  $^{13}\text{C}$  NMR spectrum of ligand  $\text{H}_4\text{bedik}$  measured in  $\text{CD}_3\text{OD}$  solvent.

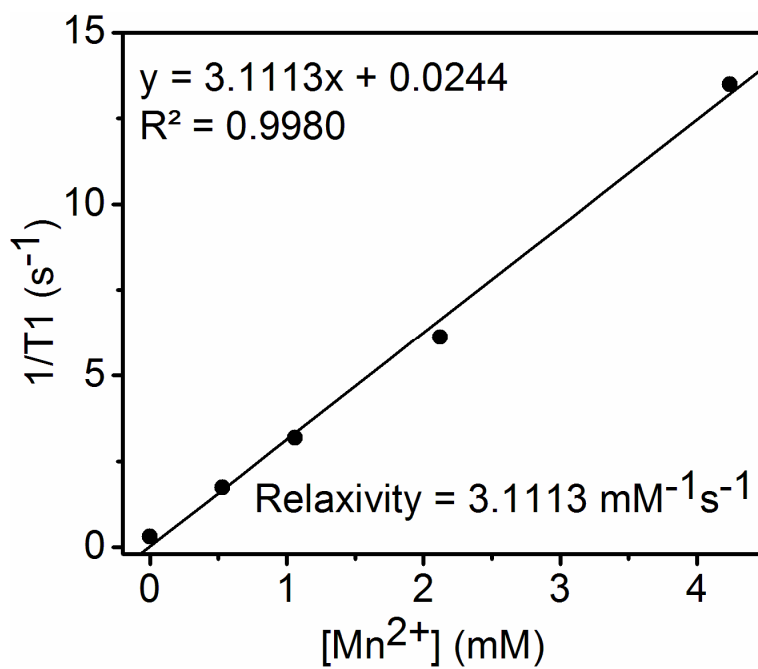

**Figure 5.**  $1/T_1$  vs  $[\text{Mn}(\text{II})]$  plot. Measurements were performed using complex **1** at 1.41 T, 25 °C, and pH = 7.4.

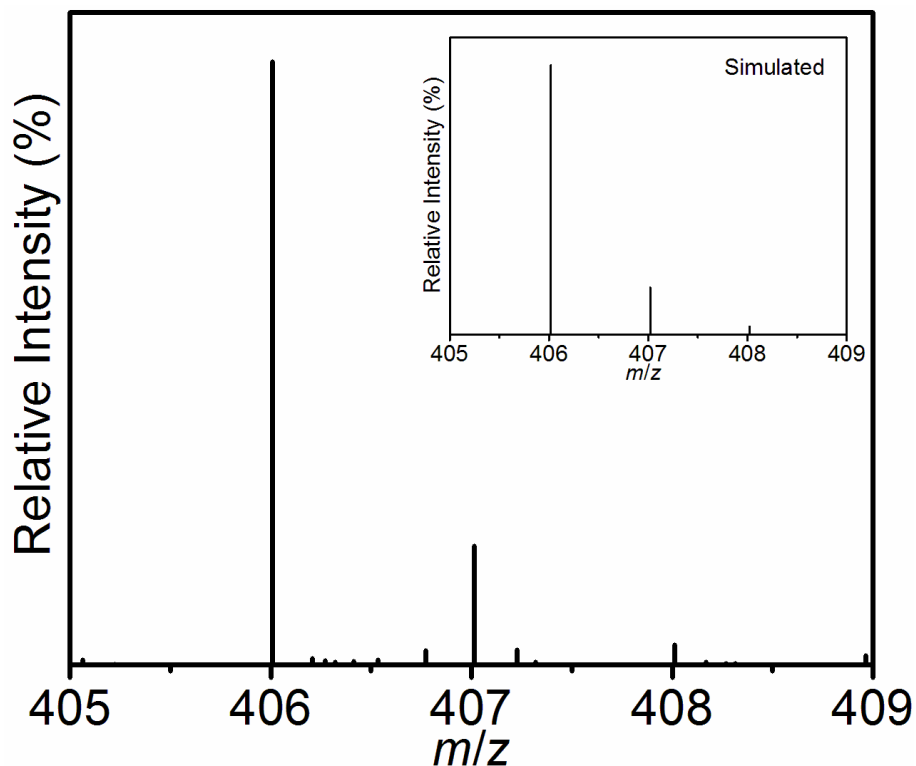

**Figure 6.** ESI-MS (-ve) mass spectrum of complex **1**. Simulated spectrum has been given as inset.

**Table 1.** Crystallographic and Structural refinement parameters for complex **1**.

|                                             |                                                                                                                                                         |
|---------------------------------------------|---------------------------------------------------------------------------------------------------------------------------------------------------------|
| Empirical formula                           | $C_{30}H_{64}Mn_4N_4O_{34}$                                                                                                                             |
| Formula weight                              | 1244.61                                                                                                                                                 |
| Crystal habit, colour                       | Plates/ colourless                                                                                                                                      |
| Crystal size, $mm^3$                        | $0.30 \times 0.28 \times 0.24$                                                                                                                          |
| Temperature, $T$                            | 293(2)                                                                                                                                                  |
| Wavelength, $\lambda$ (Å)                   | 0.71073                                                                                                                                                 |
| Crystal system                              | triclinic                                                                                                                                               |
| Space group                                 | ' $P-1$ '                                                                                                                                               |
| Unit cell dimensions                        | $a = 10.4029(8)$ Å, $b = 11.7222(8)$ Å,<br>$c = 11.8865(7)$ Å<br>$\alpha = 71.602(6)^\circ$ , $\beta = 64.303(7)^\circ$ ,<br>$\gamma = 77.400(6)^\circ$ |
| Volume, $V$ (Å <sup>3</sup> )               | 1233.77(15)                                                                                                                                             |
| $Z$                                         | 1                                                                                                                                                       |
| Calculated density, $mg \cdot mm^{-3}$      | 1.675                                                                                                                                                   |
| Absorption coefficient, $\mu$ ( $mm^{-1}$ ) | 1.106                                                                                                                                                   |
| $F(000)$                                    | 644.0                                                                                                                                                   |
| $\theta$ range for data collection          | 2.99 to 25                                                                                                                                              |
| Limiting indices                            | $-12 \leq h \leq 12$ , $-13 \leq k \leq 13$ , $-14 \leq l \leq 11$                                                                                      |
| Reflection collected / unique               | 6911/3840                                                                                                                                               |

---

|                                        |                                  |
|----------------------------------------|----------------------------------|
| Completeness to $\theta$               | 88.3% ( $\theta = 25.00^\circ$ ) |
| Max. and min. transmission             | 0.767/0.725                      |
| Refinement method                      | 'SHELXL-97 (Sheldrick, 1997)'    |
| Data / restraints / parameters         | 3840/0/324                       |
| Goodness-of-fit on $F^2$               | 1.074                            |
| Final $R$ indices [ $I > 2\sigma(I)$ ] | $R_1 = 0.0423$ , $wR_2 = 0.0890$ |
| $R$ indices (all data)                 | $R_1 = 0.0583$ , $wR_2 = 0.1012$ |
| Largest diff. peak and hole            | 0.451/-0.385 e $\text{\AA}^{-3}$ |

---
